# Supplementary material
Source: publisher site journal article supplement (https://www.dovepress.com/article/229145)
Supplement: Supplementary file 1 [file get_supplementary_file.php]

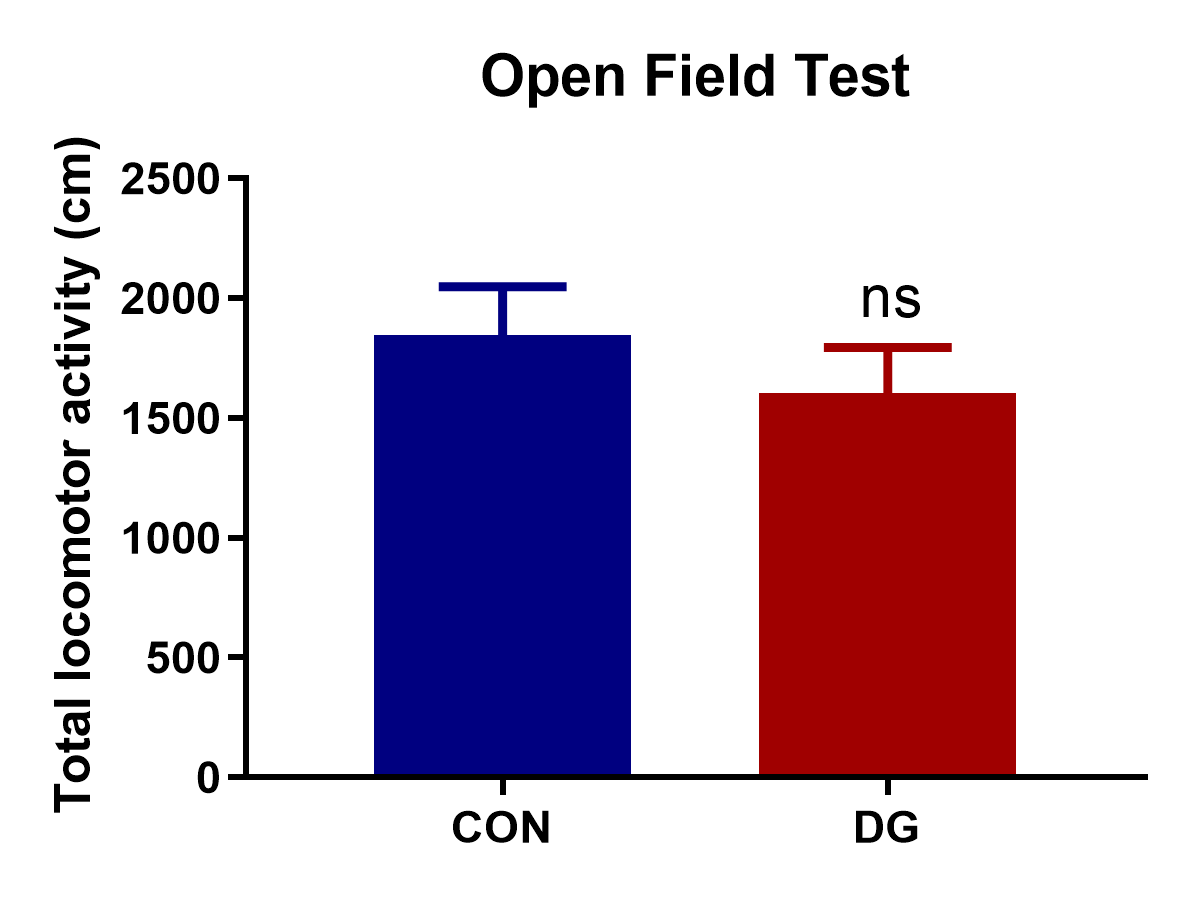


**Figure S1** Effects of DG treatment on the total locomotor activity in the open field test (OFT).

**Table S1. Primer Pairs for RT-qPCR***

| **Gene** | **Forward Primer (From 5` to 3`)** | **Reverse Primer (From 5`to 3`)** |
| --- | --- | --- |
| C3G | CAAAGCCAGTTTCTGCCACC | AAGGCACTGGGAGTACATGC |
| Ras | TGGCTGGAAGTAGGAGGTGT | CAGAAGAGAAGGGCTGCACA |
| Crk | TGGAGGTAACCAGGAGGGTT | AAGGCTGTCTTGTCGTAGGC |
| Rap1 | GTGCCTTGTCCCCGAAAATC | GTCCACACACCTGGCAAATC |
| NT3 | ACCGAACTCGAGTCCACCT | TGGAATTCTGACCTGGTGGC |
| Raf | GCCCTTCCTCTGAAGGTTCC | CGAATTGCATCCTCAATCATCCT |
| TrkA | CAAAGCCGTGGAACAGCATC | TCTCATTGAGCACAGAGCCG |
| TrkB | ATCGTGGCATTTCCGAGGTT | TATACCTGCCTGAGCCCTGA |
| B-Raf | GAGGGGTCTCATCCCAGAGT | GCAGCTTTCGGCAAAAGTCA |
| MEK1 | TGCCCAGTGGAGTATTCAGTC | AGTCTACCTCCTCGGCATCA |
| MEK2 | GCAGATGGAGAGCCCCATAG | GCTGTCCATCCCATGACCACT |
| Erk1 | TACCGAGCCCCAGAGATCAT | GGAAGATAGGCCGGTTGGAG |
| Erk2 | AGAGTGCCTTCTGACTTTCCT | GAAGACCTGATGGAGACGACG |
| BDNF | ACGTGACAAAACGTAAGGAAGTGGA | TCTCACCTGGTGGAACTGGAT |
| NGF | ATCGCTCTCCTTCACAGAGTTT | TGTACGGTTCTGCCTGTACG |
| β-actin | GCCACCAGTTCGCCATGGAT | TCTGGGCCTCGTCACCCACATA |

*RT-qPCR was used to detect the genes expression in the NT3-TrkA and Ras-MAPK pathways. C3G, Rap guanine nucleotide exchange factor 1; Ras, HRas proto-oncogene; Crk, CRK proto-oncogene adaptor protein; Rap1, RAP1A member of RAS oncogene family; NT3, NTF3 neurotrophin 3; Raf, Raf-1 proto-oncogene serine/threonine kinase; TrkA, neurotrophic receptor tyrosine kinase 1;TrkB, neurotrophic receptor tyrosine kinase 2;B-raf, B-Raf proto-oncogene serine/threonine kinase; MEK1, mitogen-activated protein kinase kinase 1; MEK2, mitogen-activated protein kinase kinase 2;Erk1, mitogen-activated protein kinase 1;Erk2, mitogen-activated protein kinase 2; BDNF, brain derived neurotrophic factor;NGF, nerve growth factor.

**Table S2. Key diﬀerential metabolites in the comparison of diterpene ginkgolides (DG) and control (CON) groups in rat hippocampus**

| **Metabolites** | **Mass** | **R.t (min)** | **VIP score** | ***T*-test (p)** | **Fold change** |
| --- | --- | --- | --- | --- | --- |
| Oxalic acid | 173 | 14.093 | 1.21 | 0.022 | 2.91 |
| Ribitol | 217 | 19.789 | 1.80 | <0.001 | 14.77 |
| 3-Cyanoalanine | 141 | 12.436 | 1.26 | 0.012 | 0.49 |
| Adenine | 165 | 19.665 | 1.11 | 0.046 | 1.48 |
| 5-Thymidylic acid | 113 | 16.000 | 1.35 | 0.013 | 1.57 |
| Eicosenoic acid | 136 | 23.365 | 1.82 | <0.001 | 0.37 |
| D-Glucose | 160 | 19.781 | 1.09 | 0.040 | 1.48 |
| Hesperetin | 225 | 6.773 | 1.60 | 0.003 | 1.50 |
| Aspirin | 210 | 9.010 | 1.41 | 0.005 | 1.32 |
| Fructose 6-phosphate | 217 | 22.755 | 1.22 | 0.034 | 1.58 |
| N-Methylhydantoin | 139 | 8.093 | 1.59 | 0.007 | 1.27 |
| 2-Hydroxypyridine | 152 | 6.809 | 1.48 | 0.023 | 1.13 |
| Gamma-Aminobutyric acid | 142 | 8.610 | 1.66 | 0.002 | 0.87 |
| 6-Phosphogluconic acid | 204 | 22.996 | 1.07 | 0.037 | 1.15 |
| Allantoic acid | 203 | 17.351 | 1.31 | 0.018 | 0.90 |
| Aniline | 136 | 6.656 | 1.54 | 0.008 | 1.23 |
| Beta-Alanine | 174 | 13.378 | 1.45 | 0.006 | 1.14 |
| Creatine | 115 | 15.377 | 1.95 | <0.001 | 0.75 |
| D-Alanyl-D-alanine | 188 | 14.706 | 1.47 | 0.004 | 1.19 |
| Ethanolamine | 178 | 6.569 | 1.93 | <0.001 | 1.41 |
| Gallic acid | 282 | 8.913 | 1.47 | 0.003 | 2.10 |
| Glycine | 102 | 8.169 | 2.32 | <0.001 | 0.24 |
| Methyl Palmitoleate | 139 | 8.265 | 1.48 | 0.038 | 1.23 |
| Mono(2-ethylhexyl)phthalate | 223 | 7.220 | 1.65 | 0.002 | 1.31 |
| Nicotinuric acid | 207 | 6.695 | 1.42 | 0.048 | 1.17 |
| O-Phosphoethanolamine | 225 | 18.576 | 2.22 | <0.001 | 1.35 |
| Phosphate | 181 | 15.659 | 2.37 | <0.001 | 0.46 |
| Phytanic acid | 216 | 14.678 | 1.50 | 0.016 | 1.27 |
| Spermine | 139 | 8.356 | 1.52 | 0.018 | 1.28 |

**Table S3. Key diﬀerential metabolites in the comparison of diterpene ginkgolides (DG) and control (CON) groups in rat prefrontal cortex**

| **Metabolites** | **Mass** | **R.t (min)** | **VIP score** | ***T*-test (p)** | **Fold change** |
| --- | --- | --- | --- | --- | --- |
| Mono(2-ethylhexyl)phthalate | 222 | 7.218 | 1.28 | 0.013 | 1.22 |
| Cytidine monophosphate | 218 | 23.489 | 1.55 | 0.004 | 0.76 |
| 1-Aminocyclopentanecarboxylate | 156 | 9.871 | 1.27 | 0.020 | 1.31 |
| 2,3-Dimethylsuccinic acid | 75 | 6.881 | 1.88 | 0.007 | 5.21 |
| Phosphate | 158 | 10.765 | 1.89 | 0.046 | 1.10 |
| Malonic acid | 222 | 11.544 | 1.69 | 0.030 | 1.25 |
| Urea | 189 | 10.407 | 1.30 | 0.048 | 1.11 |
| Sucrose | 217 | 24.283 | 1.28 | 0.033 | 0.52 |
| Myoinositol | 217 | 21.050 | 2.11 | 0.017 | 1.08 |
| L-Lactic acid | 117 | 7.132 | 1.63 | 0.029 | 0.93 |
| L-Serine | 218 | 12.231 | 1.98 | 0.005 | 1.09 |
| L-Isoleucine | 158 | 11.123 | 2.17 | 0.015 | 1.12 |
| L-Phenylalanine | 218 | 16.441 | 1.70 | 0.034 | 1.11 |
| Fumaric acid | 222 | 15.164 | 1.30 | 0.050 | 1.30 |
| Glycolic acid | 177 | 7.322 | 1.54 | 0.014 | 0.48 |
| Adenosine | 165 | 24.329 | 2.12 | 0.002 | 0.16 |

**Table S4. Molecular and cellular functions in rat hippocampus (HP) and prefrontal cortex (PFC)**

| HP-molecular and cellular functions | *p*-Value | Molecules | PFC-molecular and cellular functions | *p*-Value | Molecules |
| --- | --- | --- | --- | --- | --- |
| Cellular function and maintenance | 2.03×10-2-8.35×10-6 | 10 | Cellular growth and proliferation | 4.65×10-2-2.99×10-4 | 7 |
| Molecular transport | 2.03×10-2-8.35×10-6 | 12 | Cell death and survival | 4.65×10-2-1.69×10-3 | 9 |
| Small molecule biochemistry | 2.35×10-2-2.41×10-5 | 14 | Amino acid metabolism | 4.65×10-2-2.25×10-3 | 5 |
| Amino acid metabolism | 2.03×10-2-9.02×10-5 | 6 | Lipid metabolism | 2.82×10-2-2.25×10-3 | 6 |
| Cell death and survival | 2.64×10-2-9.66×10-5 | 13 | Molecular transport | 4.65×10-2-2.25×10-3 | 9 |
